# Supplementary material for: Transcriptome Profiling in Rat Inbred Strains and Experimental Cross Reveals Discrepant Genetic Architecture of Genome-Wide Gene Expression
Source: G3 (Bethesda). 2016 Sep 19;6(11):3671–83. doi: 10.1534/g3.116.033274 (PMC5100866; doi:10.1534/g3.116.033274)
Supplement: Supplemental Material [file supp_g3.116.033274_TableS9.pdf]

**Table S9. Overview of adipose tissue eQTLs detected in GKxBN F2 hybrids.**

Chromosome length and number of protein-coding genes are based on ENSEMBL annotations of the rat genome (RGSC3.4, Ensembl release 69). Statistical models were applied to map eQTL effects using sex and cross as additive covariates (additive model). The total number of eQTLs detected is given for each chromosome and the number of eQTLs mapped within 10Mb of the linked transcript, which putatively correspond to cis-regulated effects, is reported in parentheses. Details of eQTLs and relationships with differentially expressed genes in congenics are given in S8 Table.

| Chr   | Length (Mb) | Genes | N eQTLs    |
|-------|-------------|-------|------------|
| 1     | 267.9       | 3030  | 740 (112)  |
| 2     | 258.2       | 1488  | 116 (67)   |
| 3     | 171.1       | 1810  | 114 (59)   |
| 4     | 187.1       | 1501  | 145 (56)   |
| 5     | 173.1       | 1405  | 165 (69)   |
| 6     | 147.6       | 960   | 92 (43)    |
| 7     | 143.0       | 1390  | 208 (56)   |
| 8     | 129.0       | 1241  | 120 (60)   |
| 9     | 113.4       | 762   | 96 (28)    |
| 10    | 110.7       | 1722  | 182 (84)   |
| 11    | 87.8        | 615   | 39 (18)    |
| 12    | 46.8        | 606   | 60 (35)    |
| 13    | 111.2       | 699   | 125 (26)   |
| 14    | 112.2       | 796   | 69 (25)    |
| 15    | 109.8       | 818   | 55 (17)    |
| 16    | 90.2        | 653   | 39 (24)    |
| 17    | 97.3        | 700   | 116 (36)   |
| 18    | 87.3        | 550   | 41 (23)    |
| 19    | 59.2        | 585   | 77 (25)    |
| 20    | 55.3        | 621   | 66 (45)    |
| X     | 160.7       | 1028  | 70 (2)     |
| Total | 2718.9      | 22980 | 2735 (910) |
